# Supplementary material for: Molecular changes during progression from nonmuscle invasive to advanced urothelial carcinoma
Source: PubMed Central journal article supplement (PMC7079000; doi:10.1002/ijc.32737), 2019-11-14
Supplement: IJC-146-2636-s007.pdf [file IJC-146-2636-s007.pdf]

| Marker       | Catalog No. | Vendor         | Dilution | Evaluation      |
|--------------|-------------|----------------|----------|-----------------|
| CCNB1        | 1495-1      | Epitomics      | 1:100    | Perc.           |
| CCND1        | M3635       | Dako (Agilent) | 1:100    | Perc./Intensity |
| CDH1         | M3612       | Dako (Agilent) | 1:200    | Intensity       |
| EPCAM        | M3525       | Dako (Agilent) | 1:40     | Intensity       |
| ERBB2        | 790-2991    | Ventana        | RTU      | Intensity       |
| FGFR3        | #4574       | Cell Signaling | 1:40     | Intensity       |
| FOXA1        | ab40868     | Abcam          | 1:200    | Intensity       |
| GATA3        | #5852       | Cell Signaling | 1:800    | Perc./Intensity |
| KRT14        | MS-115      | Lab Vision     | 1:200    | Perc./Intensity |
| KRT5         | RM-2106     | Lab Vision     | 1:200    | Perc./Intensity |
| CDKN2A (p16) | #550834     | BD Biosciences | 1:50     | Intensity       |
| RB1          | #9309       | Cell Signaling | 1:100    | Perc.           |
| p53          | M7001       | Dako (Agilent) | 1:100    | Pattern         |
| TUBB2B       | LS-B4190-50 | LifeSpan       | 1:200    | Intensity       |
| VIM          | M0725       | Dako (Agilent) | 1:200    | Perc./Intensity |
| ZEB2         | 61095       | Active Motif   | 1:500    | Intensity       |
