# Supplementary material for: Molecular changes during progression from nonmuscle invasive to advanced urothelial carcinoma
Source: PubMed Central journal article supplement (PMC7079000; doi:10.1002/ijc.32737), 2019-11-14
Supplement: IJC-146-2636-s008.pdf [file IJC-146-2636-s008.pdf]

DNA extraction yield versus # detected mutations

| Quintile | n  | DNA $\mu$ g | FGFR3mut | PIK3CAmut | TERTmut | Total mut |
|----------|----|-------------|----------|-----------|---------|-----------|
| 1        | 40 | 7.1-17.1    | 20       | 6         | 34      | 60        |
| 2        | 40 | 4.4-7.1     | 14       | 5         | 35      | 54        |
| 3        | 41 | 2.4-4.4     | 9        | 6         | 36      | 51        |
| 4        | 41 | 1.1-2.4     | 12       | 6         | 37      | 55        |
| 5        | 41 | 0.1-1.1     | 11       | 6         | 30      | 47        |

Tumor ESTIMATE score versus # detected mutations

| Quintile | n  | ESTIMATE | FGFR3mut | PIK3CAmut | TERTmut | Total mut |
|----------|----|----------|----------|-----------|---------|-----------|
| 1        | 39 | 93-98%   | 15       | 3         | 35      | 53        |
| 2        | 40 | 88-93%   | 17       | 6         | 28      | 51        |
| 3        | 40 | 83-88%   | 21       | 9         | 37      | 67        |
| 4        | 40 | 70-82%   | 7        | 6         | 39      | 52        |
| 5        | 40 | 41-70%   | 7        | 3         | 31      | 41        |

Tumor ESTIMATE score versus molecular subtype (mRNA)

| Quintile | n  | ESTIMATE | Uro | GU | Ba/Sq | Mes-like | Sc/NE |
|----------|----|----------|-----|----|-------|----------|-------|
| 1        | 39 | 93-98%   | 34  | 3  | 0     | 0        | 2     |
| 2        | 40 | 88-93%   | 29  | 8  | 0     | 0        | 3     |
| 3        | 40 | 83-88%   | 34  | 4  | 1     | 0        | 1     |
| 4        | 40 | 70-82%   | 24  | 11 | 2     | 1        | 2     |
| 5        | 40 | 41-70%   | 20  | 5  | 5     | 9        | 1     |
