# Supplementary material for: Molecular changes during progression from nonmuscle invasive to advanced urothelial carcinoma
Source: PubMed Central journal article supplement (PMC7079000; doi:10.1002/ijc.32737), 2019-11-14
Supplement: IJC-146-2636-s009.pdf [file IJC-146-2636-s009.pdf]

| Gene   | Mutation  | N, tumors analyzed | N, tumors | N, patients (of 71 analyzed) |
|--------|-----------|--------------------|-----------|------------------------------|
| FGFR3  | R248C     | 219                | 9         | 6                            |
|        | S249C     | 219                | 29        | 13                           |
|        | G372C     | 219                | 1         | 1                            |
|        | G372S*    | 219                | 1         | 1                            |
|        | S373C     | 219                | 6         | 1                            |
|        | Y375C     | 219                | 13        | 6                            |
|        | G382R     | 219                | 5         | 2                            |
|        | A393E     | 219                | 0         | 0                            |
|        | K652E**   | 213                | 6         | 2                            |
| PIK3CA | E542K     | 219                | 8         | 5                            |
|        | E545G     | 219                | 0         | 0                            |
|        | E545K     | 219                | 15        | 8                            |
|        | H1047R    | 219                | 7         | 3                            |
|        | H1047L*** | 219                | 2         | 2                            |
| TERT   | C228T     | 215                | 159       | 59                           |
|        | C228A     | 215                | 1         | 1                            |
|        | C242T     | 215                | 8         | 8                            |
|        | C250T     | 215                | 17        | 12                           |

\* This mutation was detected by the assay designed for the G372C mutation

\*\* Two assays were used for codon 652, but only the K652E mutation was detected

\*\*\* These mutations were detected by the assay designed for the H1047R mutation
