# Supplementary material for: Molecular changes during progression from nonmuscle invasive to advanced urothelial carcinoma
Source: PubMed Central journal article supplement (PMC7079000; doi:10.1002/ijc.32737), 2019-11-14
Supplement: IJC-146-2636-s010.pdf [file IJC-146-2636-s010.pdf]

| No BCG                                 |            |             | BCG coinciding         |               |             | BCG not coinciding |            |             | BCG unknown          |            |             |
|----------------------------------------|------------|-------------|------------------------|---------------|-------------|--------------------|------------|-------------|----------------------|------------|-------------|
| Subtype change                         | Mut change | Prog Type   | Subtype change         | Mut change    | Prog Type   | Subtype change     | Mut change | Prog Type   | Subtype change       | Mut change | Prog Type   |
| Uro → ScNE (RNA)                       | -C228T     | MIBC (pt1)  | Uro → Ba/Sq (RNA)      | 72C-Y375C-H1C | MIBC (pt14) | GU → Mes (RNA)     | -C228T     | RC (pt32)   | Uro → ScNE (RNA+IHC) | ID         | MIBC (pt57) |
| ScNE → Uro (RNA)                       | +R248C     | MIBC (pt1)  | Uro → Ba/Sq (RNA)      | +E542K-C228T  | MIBC (pt17) | Uro → GU (IHC)     | N/A        | RC (pt33)   |                      |            |             |
| Uro → Ba/Sq (RNA+IHC)                  | ID         | MIBC (pt1)  | Mes → GU (IHC)         | ID            | RC (pt32)   | Uro → Ba/Sq (RNA)  | ID         | MIBC (pt41) |                      |            |             |
| GU → ScNE (RNA+IHC)                    | +S249C     | M+          | Uro → Mes (IHC)        | ID            | MIBC (pt41) | Uro → Mes (RNA)    | -C228T     | MIBC (pt48) |                      |            |             |
| Uro → GU (RNA)                         | ID         | MIBC (pt16) | Mes → ScNE (RNA)       | -C250T        | RC (pt45)   | Uro → Mes (RNA)    | ID         | MIBC (pt48) |                      |            |             |
| GU → Uro (RNA)                         | N/A        | MIBC (pt25) | Uro → GU (RNA)         | ID            | MIBC (pt46) | ScNE → GU (IHC)    | N/A        | M+ (pt55)   |                      |            |             |
| [Uro (RNA), GU (IHC)] → ScNE (RNA+IHC) | ID         | MIBC (pt25) | Mes → Uro (RNA)        | +C228T        | MIBC (pt48) | Ba/Sq → Mes (IHC)  | ID         | MIBC (pt56) |                      |            |             |
| GU → Ba/Sq (IHC)                       | ID         | MIBC (pt58) | Uro → ScNE (RNA + IHC) | N/A           | M+ (pt55)   | Uro → Mes (IHC)    | N/A        | MIBC (pt60) |                      |            |             |
|                                        |            |             | Uro → Ba/Sq (IHC)      | -C228T        | MIBC (pt56) | Mes → Uro (IHC)    | N/A        | MIBC (pt60) |                      |            |             |
|                                        |            |             | GU → Mes (RNA)         | ID            | MIBC (pt63) |                    |            |             |                      |            |             |
|                                        |            |             | Uro → GU (RNA)         | -C228T        | MIBC (pt64) |                    |            |             |                      |            |             |
