# Supplementary material for: Molecular changes during progression from nonmuscle invasive to advanced urothelial carcinoma
Source: PubMed Central journal article supplement (PMC7079000; doi:10.1002/ijc.32737), 2019-11-14
Supplement: IJC-146-2636-s011.pdf [file IJC-146-2636-s011.pdf]

| <b>p53 pattern</b>    | <b>Total cases</b> | <b>Concordant</b> | <b>Discordant*</b> | <b>Single core</b> |
|-----------------------|--------------------|-------------------|--------------------|--------------------|
| Wild-type (wt)        | 221                | 144               | 6                  | 70                 |
| Overexpression (oe)   | 57                 | 40                | 3                  | 14                 |
| Complete absence (ca) | 9                  | 6                 | 3                  | 0                  |
| Cytoplasmic (cy)      | 1                  | 1                 | 0                  | 0                  |

\* 6 discordant tumors, 3 wt/oe, and 3 wt/ca
